# Supplementary material for: Acquired von Willebrand Syndrome in a Patient with Multiple Comorbidities, Including MALT Lymphoma with IgA Monoclonal Gammopathy and Hyperviscosity Syndrome
Source: PubMed Central journal article supplement — Intern Med. 2022 Jul 22;62(4):605–11. doi: 10.2169/internalmedicine.9815-22 (PMC10017253; doi:10.2169/internalmedicine.9815-22), 2022-07-22
Supplement: 1349-7235-62-0605-s001.pdf [file 1349-7235-62-0605-s001.pdf]

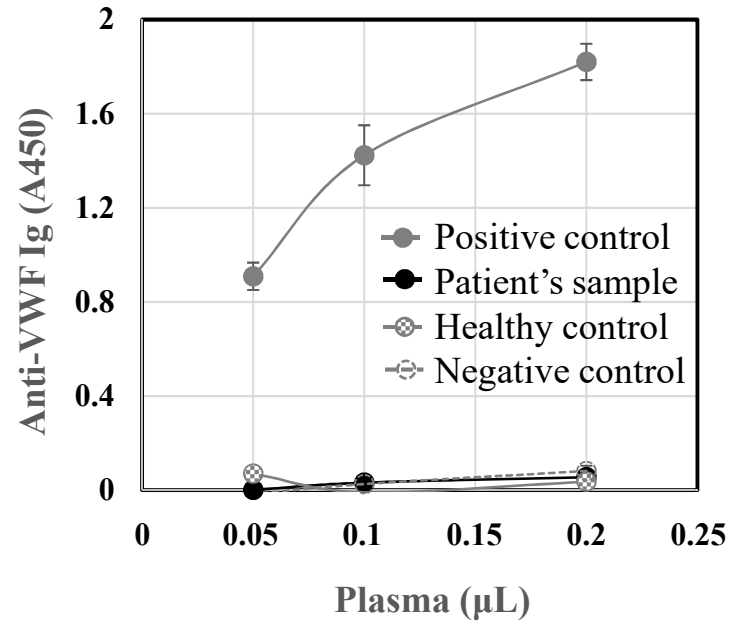

**Supplementary Figure 1. Detection of anti-VWF immunoglobulin.**

Anti-VWF immunoglobulin (Ig) in the patient's sample (black circles; depicted as an amount equivalent to undiluted volume) was detected by using anti-human Ig (common for IgG, IgM and IgA) as a detecting antibody and purified VWF (200 ng/well) coated on a 96-well plate in a sandwich-enzyme-linked immunosorbent assay (ELISA).
