# Supplementary material for: Acquired von Willebrand Syndrome in a Patient with Multiple Comorbidities, Including MALT Lymphoma with IgA Monoclonal Gammopathy and Hyperviscosity Syndrome
Source: PubMed Central journal article supplement — Intern Med. 2022 Jul 22;62(4):605–11. doi: 10.2169/internalmedicine.9815-22 (PMC10017253; doi:10.2169/internalmedicine.9815-22), 2022-07-22
Supplement: 1349-7235-62-0605-s002.pdf [file 1349-7235-62-0605-s002.pdf]

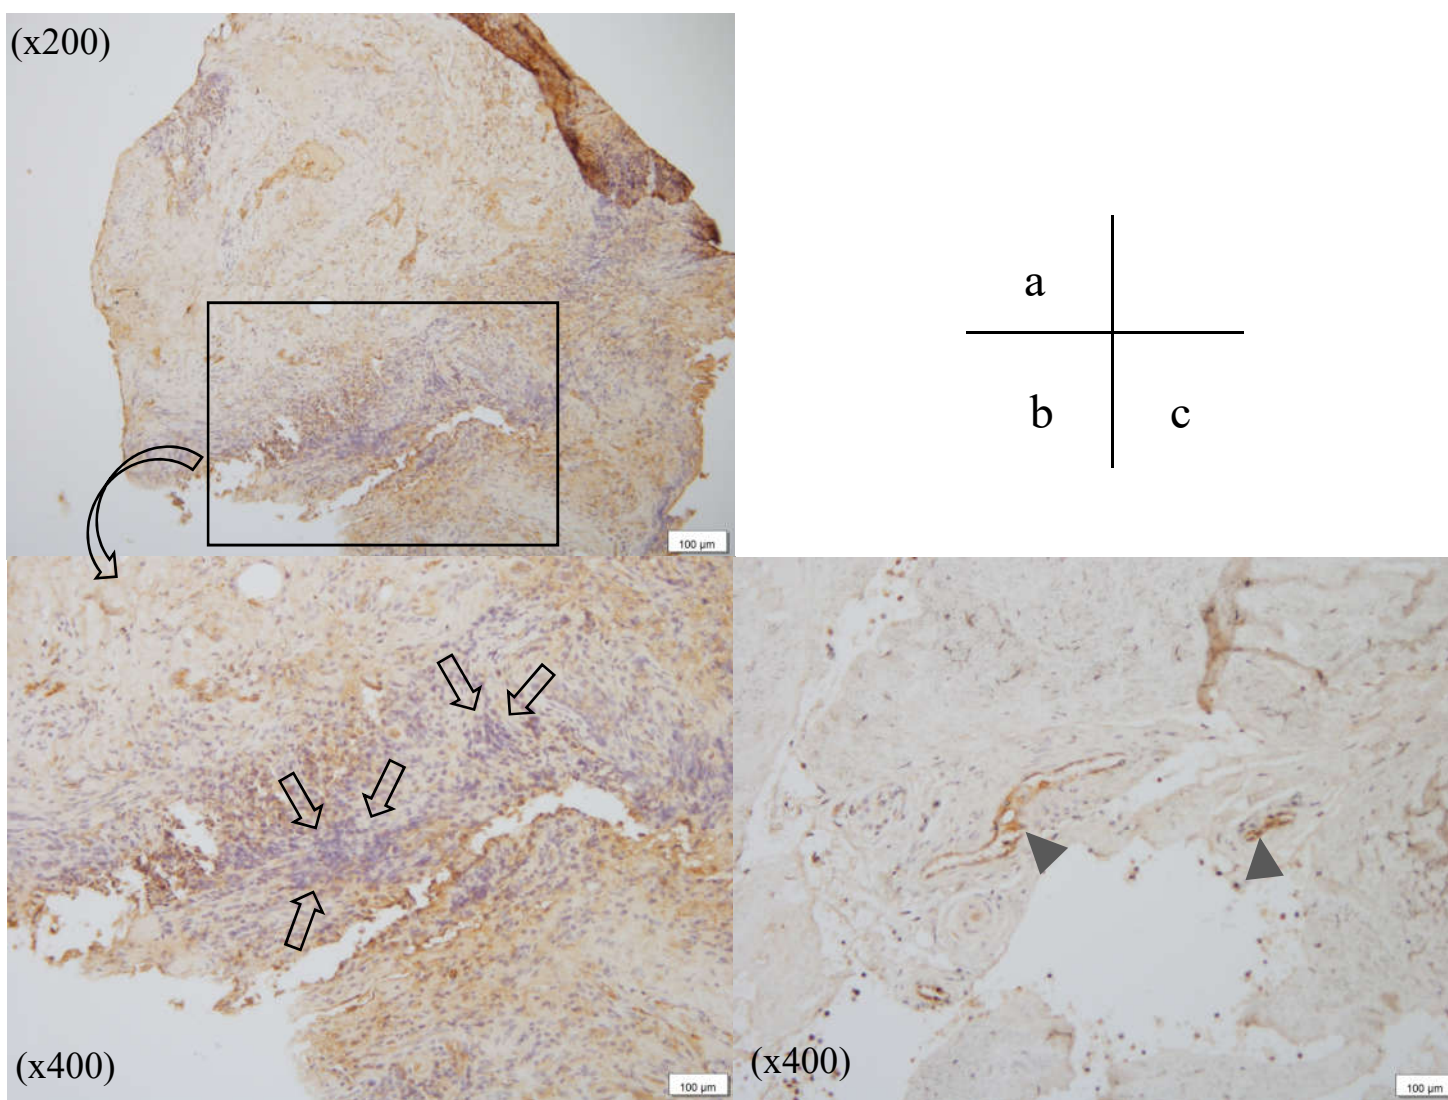

**Supplementary Figure 2. Detection of adsorption of VWF on lymphoma cells.**

a. Pathological examination by immunostaining did not find the adsorption of VWF on lymphoma cells. Magnification,  $\times 200$  b. Immunohistochemistry of lymphoma cells of the lung tissue. The arrows indicate infiltrated lymphoma cells. The expressions of VWF were not detected in the lymphoma cells. Magnification,  $\times 400$  c. Endothelial cells of a bone marrow biopsy specimen, which was obtained from an unrelated patient with chronic myeloid leukemia in complete remission, serve as positive control. Arrowheads indicate the endothelial cells expressing VWF. Magnification,  $\times 400$
