# Supplementary material for: Acquired von Willebrand Syndrome in a Patient with Multiple Comorbidities, Including MALT Lymphoma with IgA Monoclonal Gammopathy and Hyperviscosity Syndrome
Source: PubMed Central journal article supplement — Intern Med. 2022 Jul 22;62(4):605–11. doi: 10.2169/internalmedicine.9815-22 (PMC10017253; doi:10.2169/internalmedicine.9815-22), 2022-07-22
Supplement: 1349-7235-62-0605-s003.pdf [file 1349-7235-62-0605-s003.pdf]

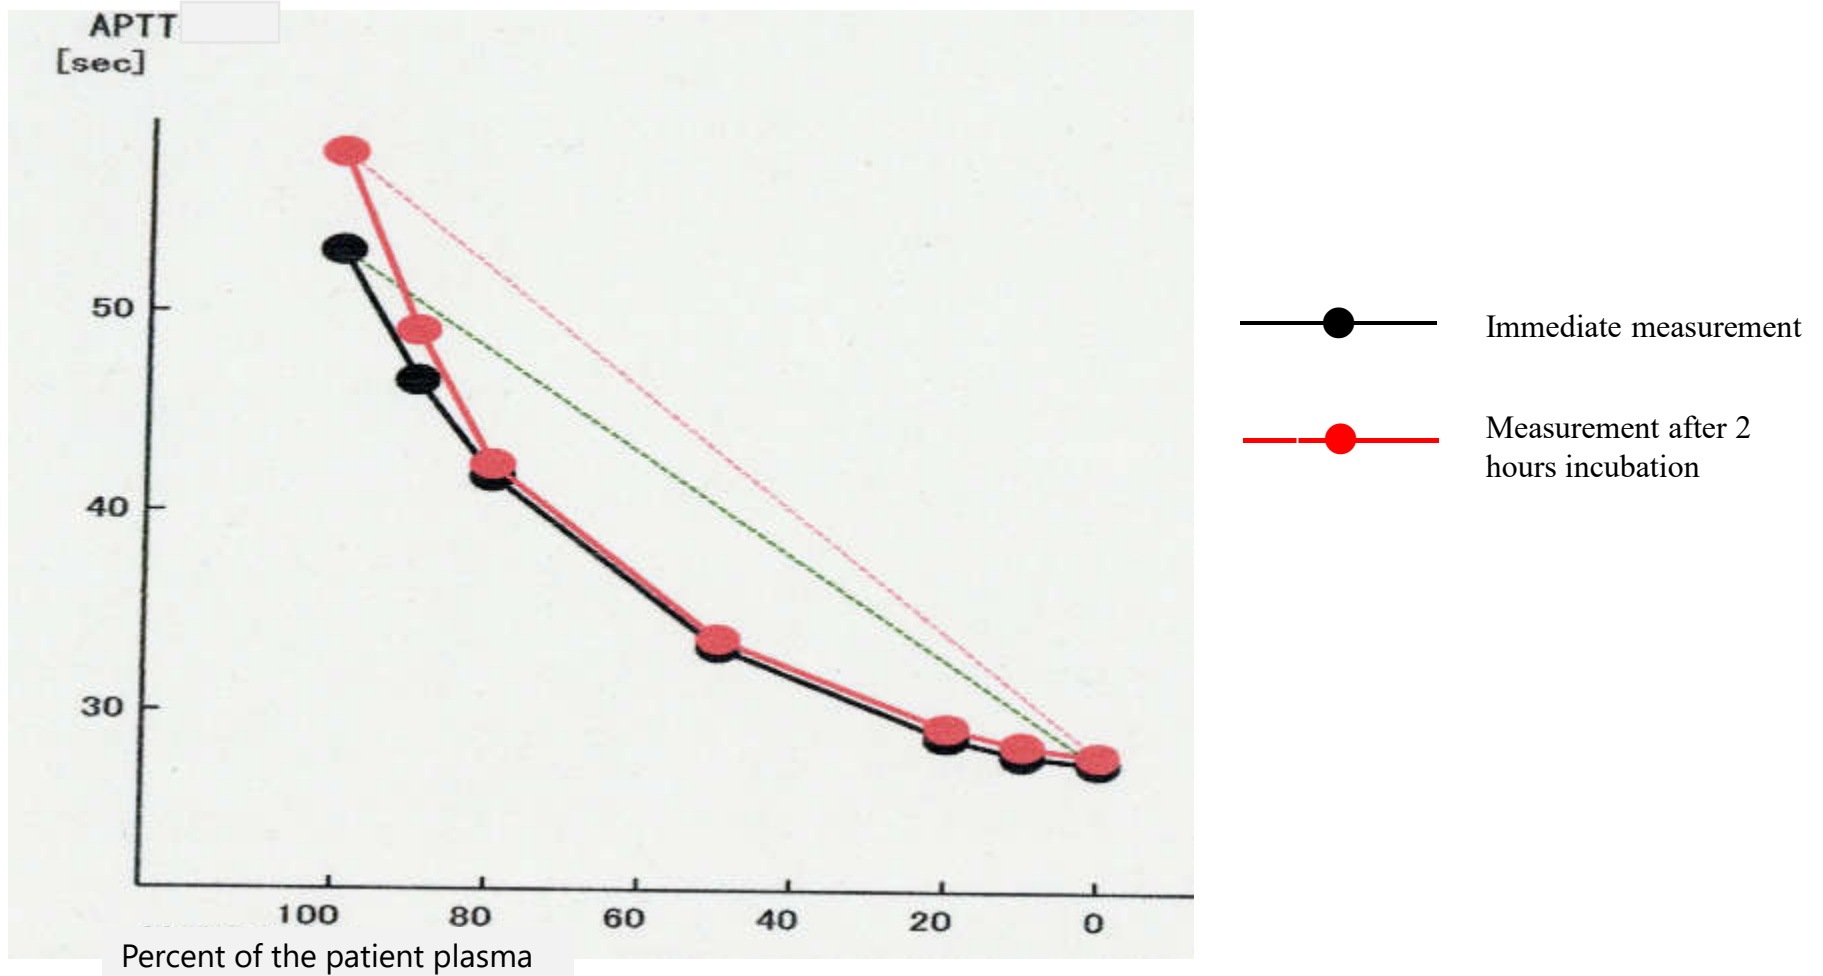

**Supplementary Figure 3. APTT cross-mixing test.**

The patient and normal plasma were mixed with various ratios. APTT was measured immediately after mixing or after 2 hours of reaction. Both lines showed the downward convex pattern, ruling out the presence of the inhibitors to factor VIII.
